# Supplementary material for: Theoretical study of two-dimensional tetragonal transition metal chalcogenides and the potassium derivatives
Source: Royal Society of Chemistry journal article supplement (doi:10.1039/d1se01981c), 2022-01-01
Supplement: d1se01981c1.pdf [file d1se01981c1.pdf]

*Supporting Information*

Theoretical Study of Two-Dimensional Tetragonal  
Transition Metal Chalcogenides and the Potassium  
Derivatives

Jia Zhou,\* Yanxin Cheng, and Yaoyun Zhu

State Key Laboratory of Urban Water Resource and Environment, School of Science, Harbin

Institute of Technology Shenzhen, Shenzhen 518055, China

E-mail: [jiazhou@hit.edu.cn](mailto:jiazhou@hit.edu.cn)

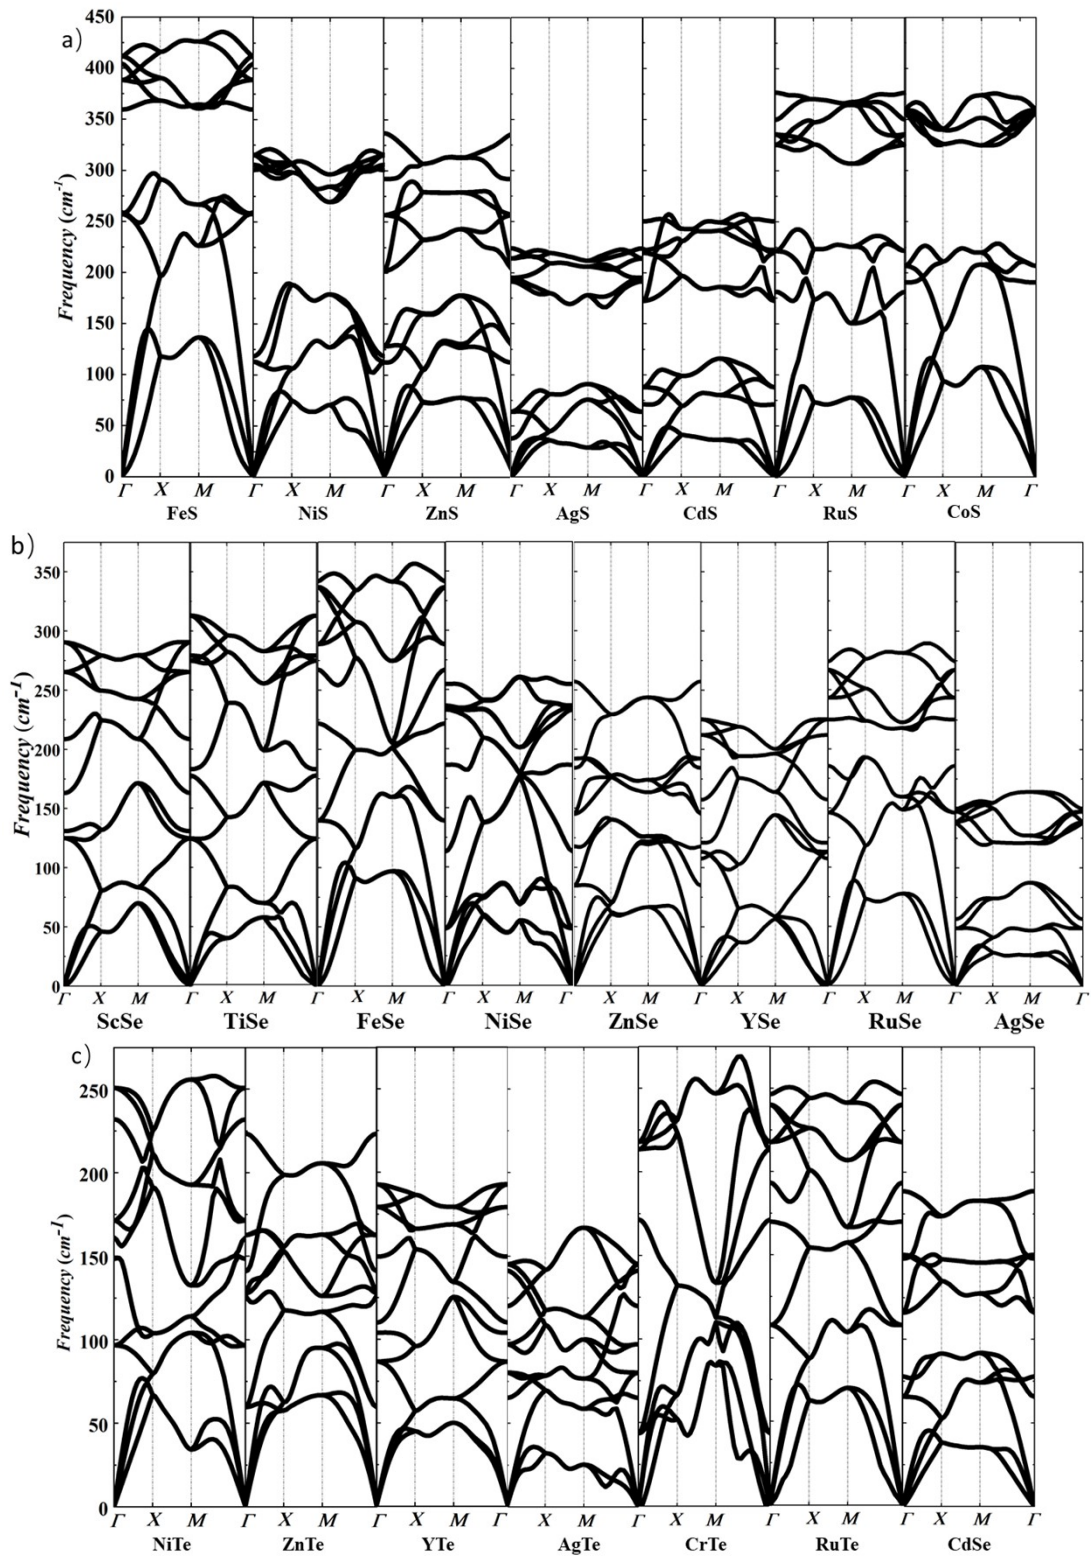

**Figure S1.** Phonon dispersion spectra of the twenty-two stable MX monolayers.

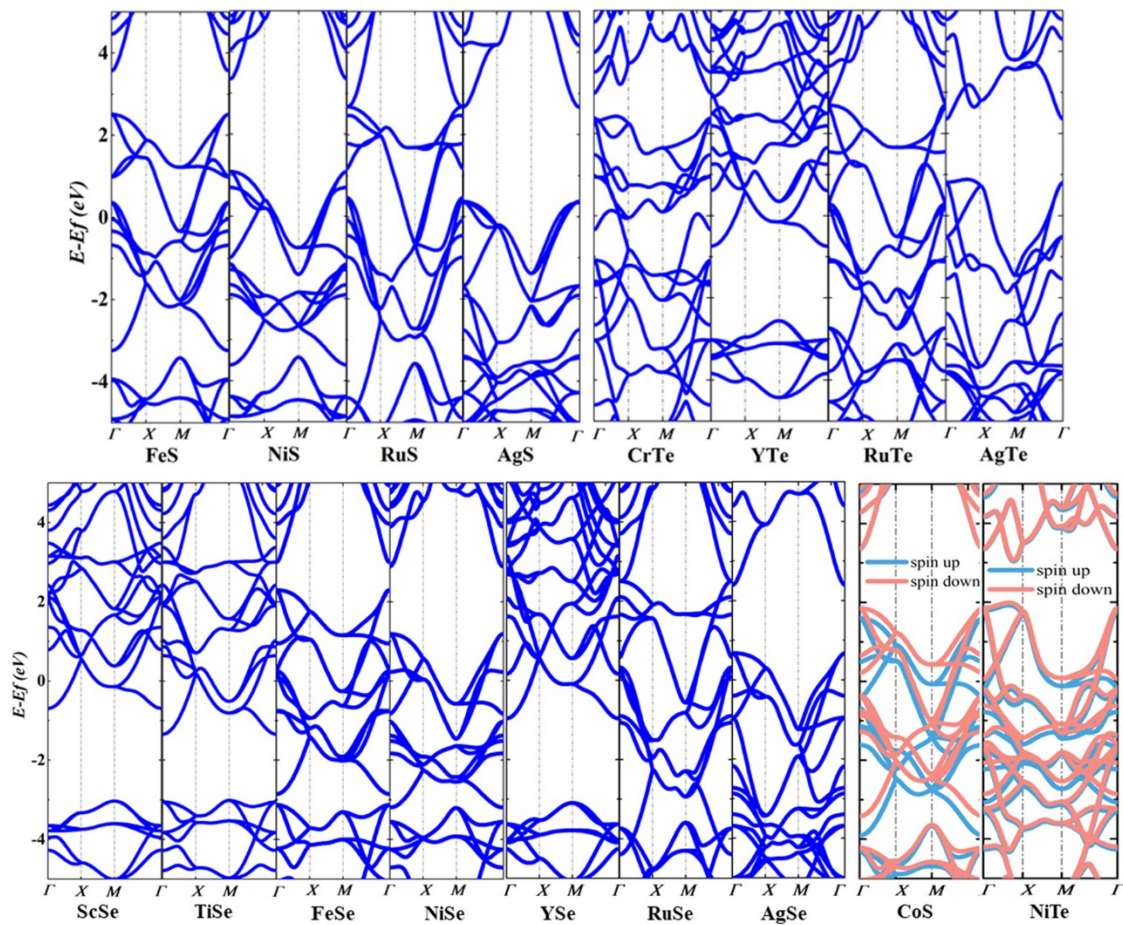

**Figure S2.** Band structures of MX monolayers at the PBE-D3 level.

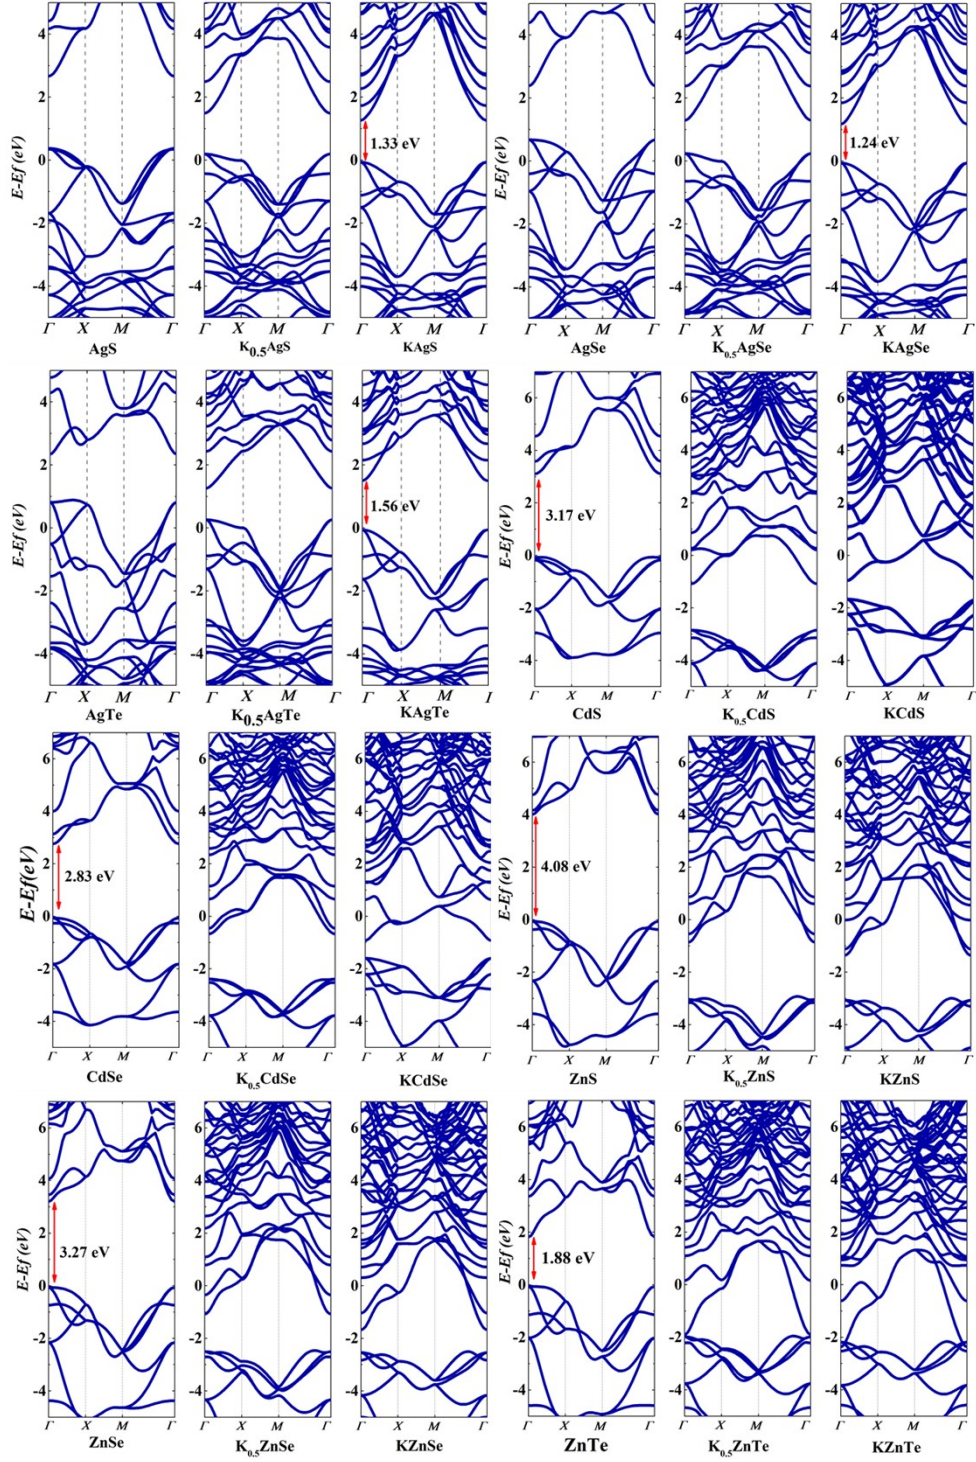

**Figure S3.** Band structures of  $K_nMX$  monolayers.
